# Supplementary material
Source: PubMed Central journal article supplement (PMC7314282)

**Figure S.1** Flow diagram of women who were randomized, excluded, and included for analysis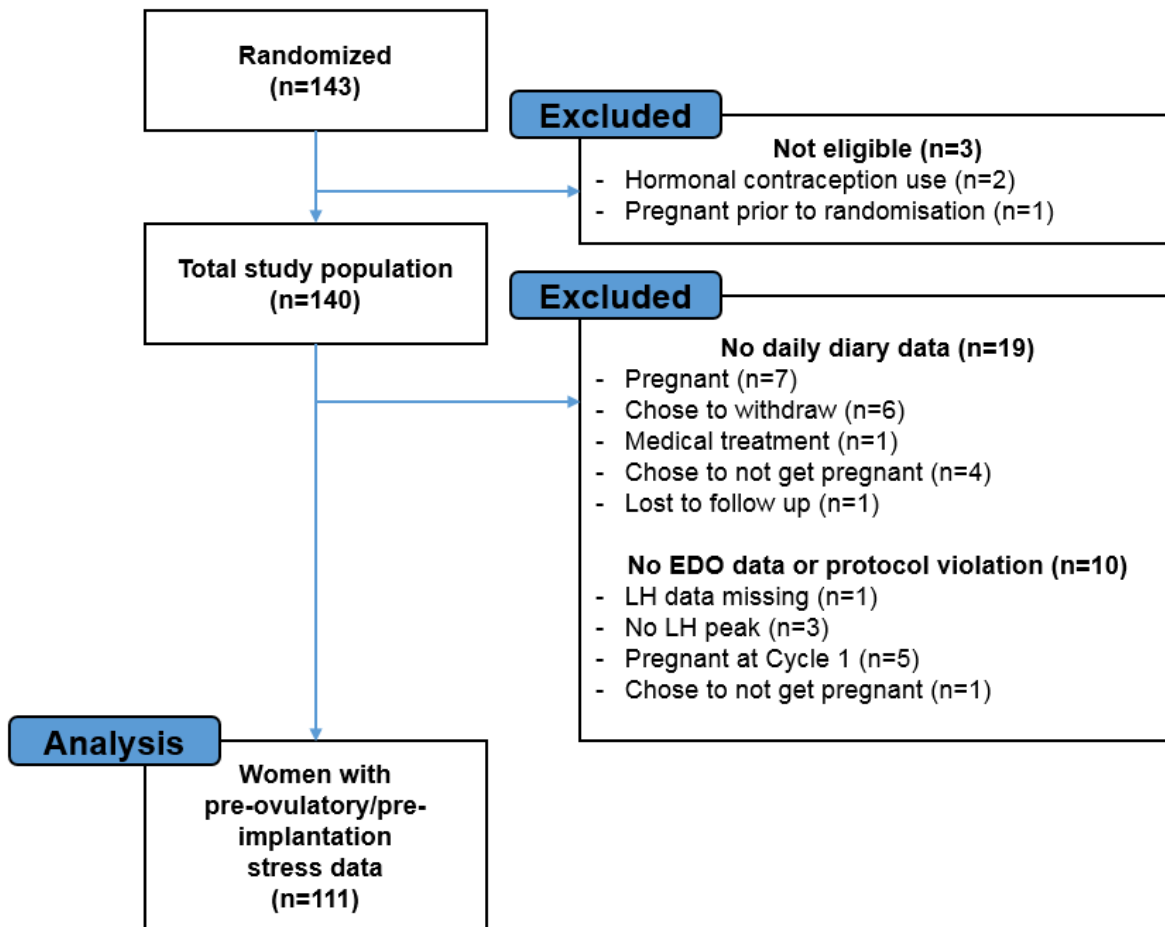

Supplement: NIHMS1589837-supplement-supplementary_figure_in_pdf.pdf [file NIHMS1589837-supplement-supplementary_figure_in_pdf.pdf]
